# Supplementary material for: A General Method for Targeted Quantitative Cross-Linking Mass Spectrometry
Source: PubMed Central journal article supplement (PMC5172568; doi:10.1371/journal.pone.0167547), 2016-12-20

# 1mM BDP-NHP Hydrolysis (Absorbance @ 410 nm)

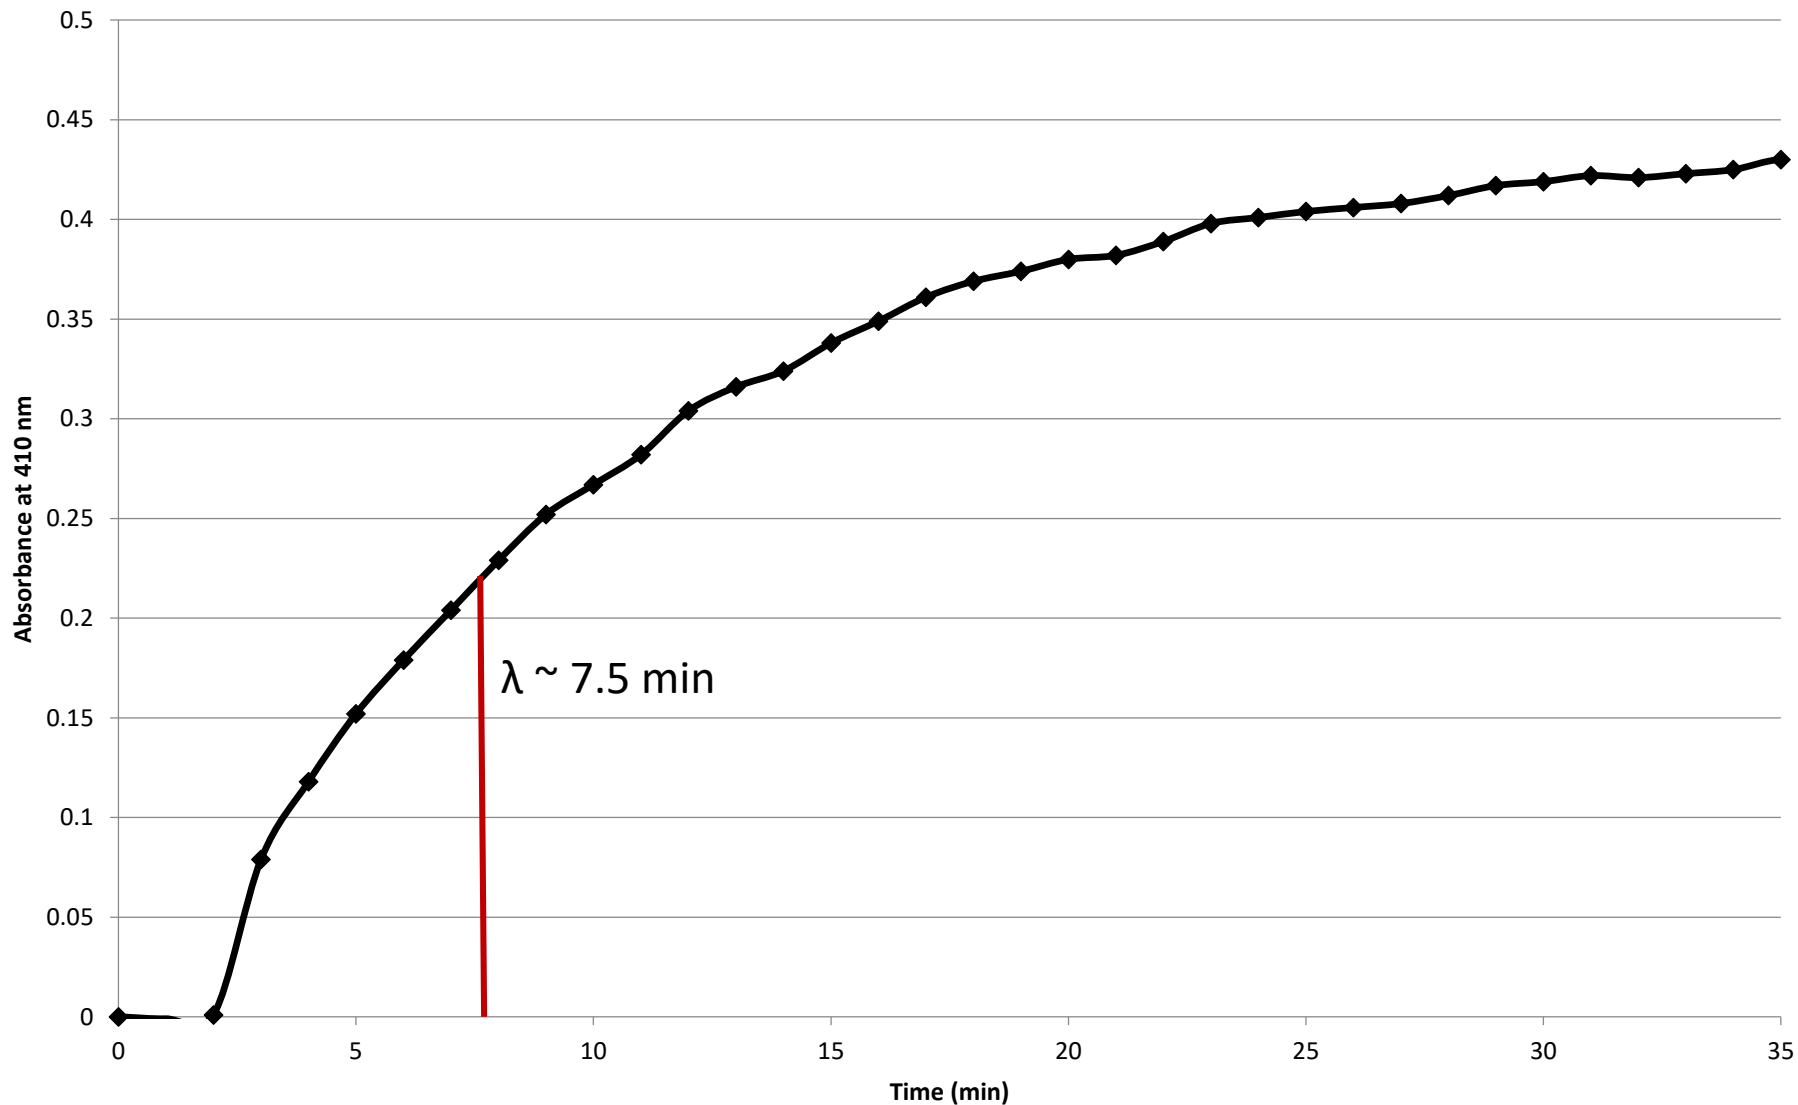

Supplement: pone.0167547.s001.pdf [file pone.0167547.s001.pdf]
