# Supplementary material for: A General Method for Targeted Quantitative Cross-Linking Mass Spectrometry
Source: PubMed Central journal article supplement (PMC5172568; doi:10.1371/journal.pone.0167547), 2016-12-20
Supplement: pone.0167547.s004.pdf [file pone.0167547.s004.pdf]

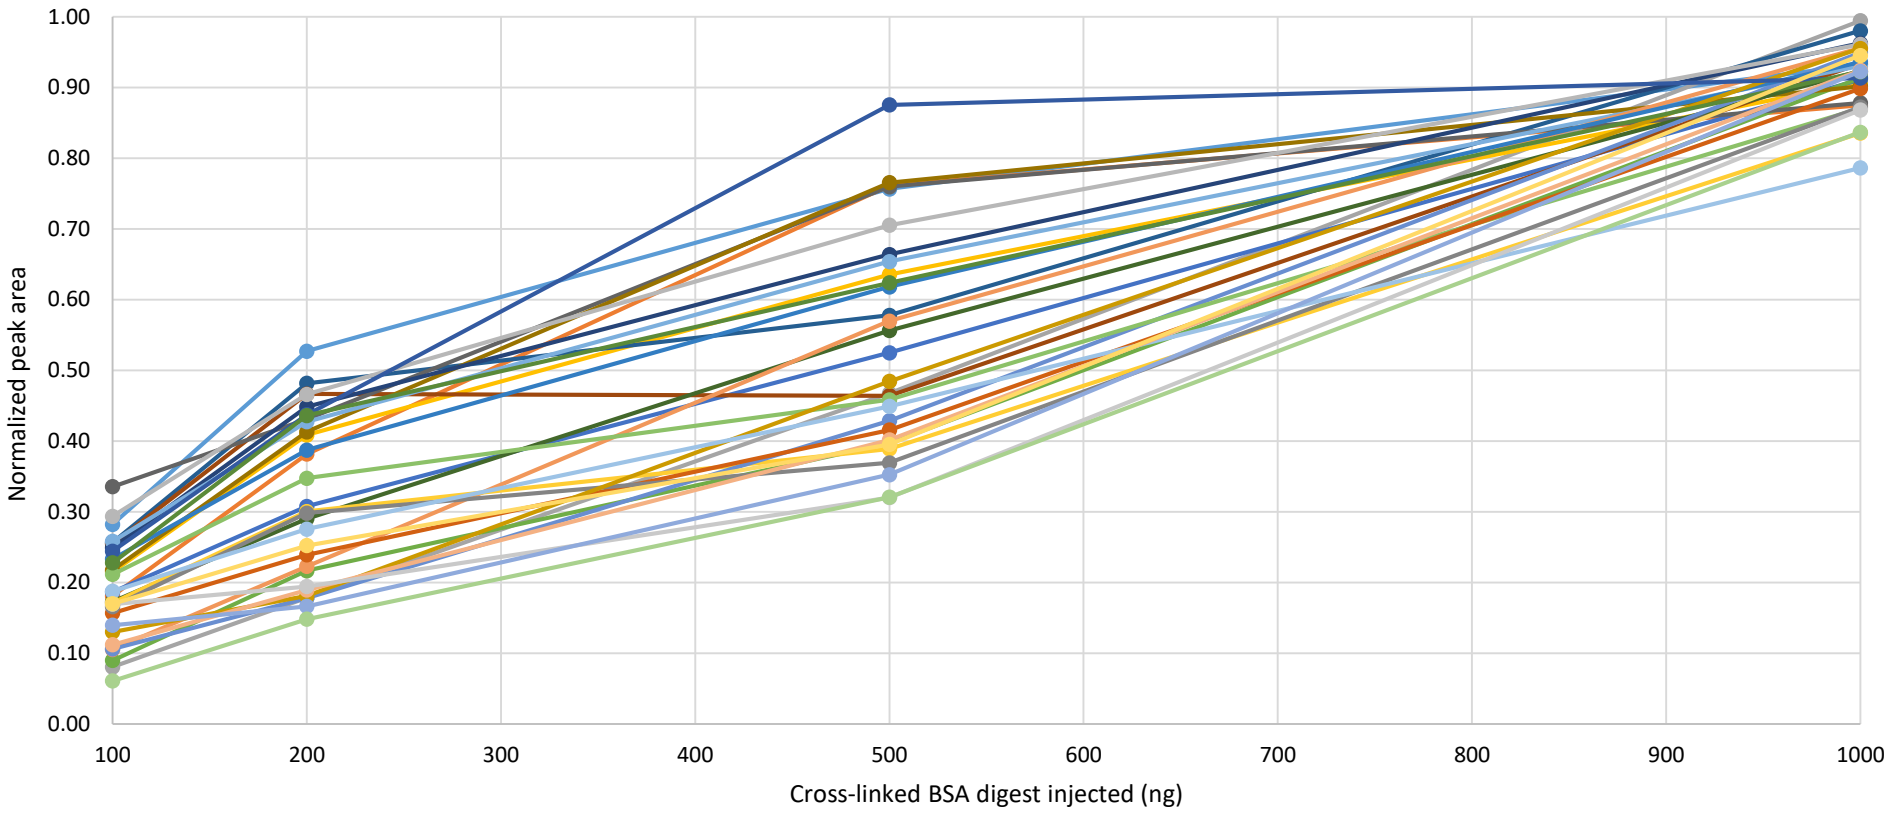

- LSQK[325.13]FPK\_C[160.03]C[160.03]TK[325.13]PESER
- ALK[325.13]AWSVAR\_DTHK[325.13]SEIAHR
- SLGK[325.13]VGTR\_LC[160.03]VLHEK[325.13]TPVSEK
- C[160.03]ASIQK[325.13]FGER\_VHK[325.13]EC[160.03]C[160.03]HGDLLC[160.03]ADDR
- LAK[325.13]EYEATLEEC[160.03]C[160.03]AK\_VHK[325.13]EC[160.03]C[160.03]HGDLLC[160.03]ADDRADLAK
- VTK[325.13]C[160.03]C[160.03]TESLVNR\_LAK[325.13]EYEATLEEC[160.03]C[160.03]AK
- LSQK[325.13]FPK\_C[160.03]ASIQK[325.13]FGER
- C[160.03]ASIQK[325.13]FGER\_LAK[325.13]EYEATLEEC[160.03]C[160.03]AK
- ALK[325.13]AWSVAR\_LVTDLT[325.13]VHK
- ALK[325.13]AWSVAR\_LAK[325.13]EYEATLEEC[160.03]C[160.03]AK
- LSQK[325.13]FPK\_GAC[160.03]LLPK[325.13]IETM[147.04]R
- K[325.13]FWGK\_LK[325.13]PDPNTLC[160.03]DEFK
- LC[160.03]VLHEK[325.13]TPVSEK\_DDSPDLPK[325.13]LKPDPNTLC[160.03]DEFKADEK
- SLGK[325.13]VGTR\_DDSPDLPK[325.13]LKPDPNTLC[160.03]DEFK
- LSQK[325.13]FPK\_GAC[160.03]LLPK[325.13]IETMR
- DTHK[325.13]SEIAHR\_FK[325.13]DLGEEHFK
- SLGK[325.13]VGTR\_LSQK[325.13]FPK
- LSQK[325.13]FPK\_LKEC[160.03]C[160.03]DK[325.13]PLLEK
- LAK[325.13]EYEATLEEC[160.03]C[160.03]AK\_VHK[325.13]EC[160.03]C[160.03]HGDLLC[160.03]ADDR
- ALK[325.13]AWSVAR\_VHK[325.13]EC[160.03]C[160.03]HGDLLC[160.03]ADDR
- ALK[325.13]AWSVAR\_VHK[325.13]EC[160.03]C[160.03]HGDLLC[160.03]ADDRADLAK
- LC[160.03]VLHEK[325.13]TPVSEK\_LAK[325.13]EYEATLEEC[160.03]C[160.03]AK
- SLGK[325.13]VGTR\_LK[325.13]PDPNTLC[160.03]DEFKADEK
- LC[160.03]VLHEK[325.13]TPVSEK\_LK[325.13]PDPNTLC[160.03]DEFKADEK
- ALK[325.13]AWSVAR\_C[160.03]ASIQK[325.13]FGER
- SLGK[325.13]VGTR\_NEC[160.03]FLSHKDDSPDLPLK[325.13]PDPNTLC[160.03]DEFK
- SLGK[325.13]VGTR\_DDSPDLPK[325.13]LKPDPNTLC[160.03]DEFKADEK
- SLGK[325.13]VGTR\_GAC[160.03]LLPK[325.13]IETMR
- SLGK[325.13]VGTR\_K[325.13]QTALVELLK
- K[325.13]FWGK\_LVNELTEFAK[325.13]TC[160.03]VADESHAGC[160.03]EK
