# Supplementary material for: A General Method for Targeted Quantitative Cross-Linking Mass Spectrometry
Source: PubMed Central journal article supplement (PMC5172568; doi:10.1371/journal.pone.0167547), 2016-12-20
Supplement: pone.0167547.s006.pdf [file pone.0167547.s006.pdf]

## Generate a PRM transition .txt file for analysis of cross-links

### PRM Transition Information:

Peptide A: FYEAFSKNLK

Peptide B: FYEQFSKNIK

Site A: 7

Site B: 7

#### Cross-linker Type:

- BDP-NHP
- DSSO
- Other

#### Precursor Charge State:

- 4+
- 5+
- 6+

#### Modifications:

##### *Peptide A:*

- None.
- use carbamidomethyl cysteine (C, monoisotopic) - 57.021464
- User Defined Modifications:

#@pos, i.e. "16.0@2 57.1@3", space separated for addition to N-term use '[' and for C-term use ']', e.g. "16.0@[

##### *Peptide B:*

- None.
- use carbamidomethyl cysteine (C, monoisotopic) - 57.021464
- User Defined Modifications:

#@pos, i.e. "16.0@2 57.1@3", space separated for addition to N-term use '[' and for C-term use ']', e.g. "16.0@[

Generate PRM Transitions
